# Supplementary material for: Fatty acid binding protein 5 promotes metastatic potential of triple negative breast cancer cells through enhancing epidermal growth factor receptor stability
Source: PubMed Central journal article supplement (PMC4467443; doi:10.18632/oncotarget.3442), 2015-01-31
Supplement: oncotarget-06-6373-s001.pdf [file oncotarget-06-6373-s001.pdf]

## Fatty acid binding protein 5 promotes metastatic potential of triple negative breast cancer cells through enhancing epidermal growth factor receptor stability

### Supplementary Material

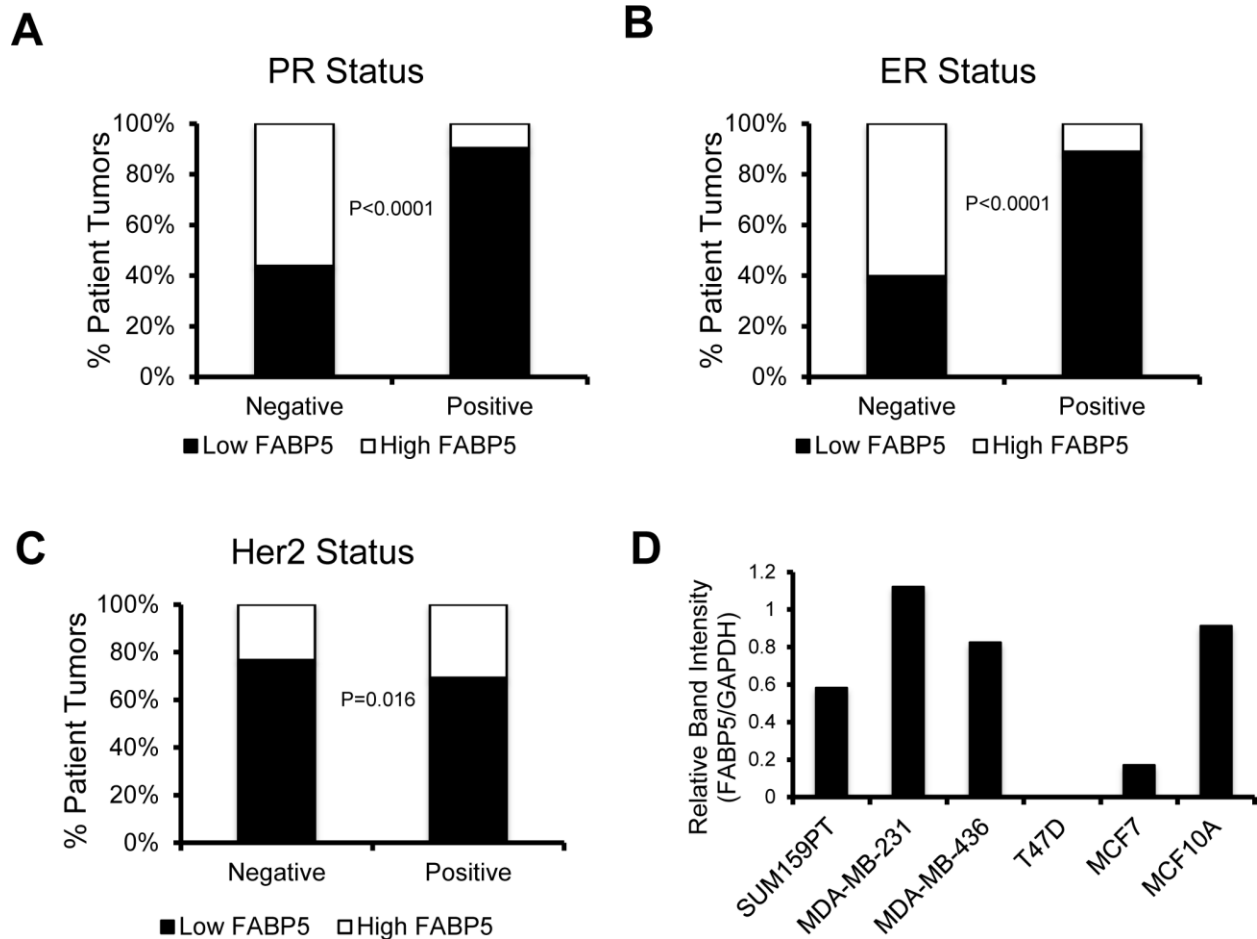

Supplemental Figure S1 : FBP5 expression correlates with individual receptor status in patient data. Graphical representation of FBP5 expression in patient samples compared to PR (A,  $P < 0.0001$ ), ER (B,  $P < 0.0001$ ), and HER2 (C,  $P < 0.016$ ) expression, respectively. (D) Quantification of relative FBP5 expression in SUM159PT, MDA-MB-231, MDA-MB-436, T47D, MCF7, and MCF10A cells calculated with respect to GAPDH.

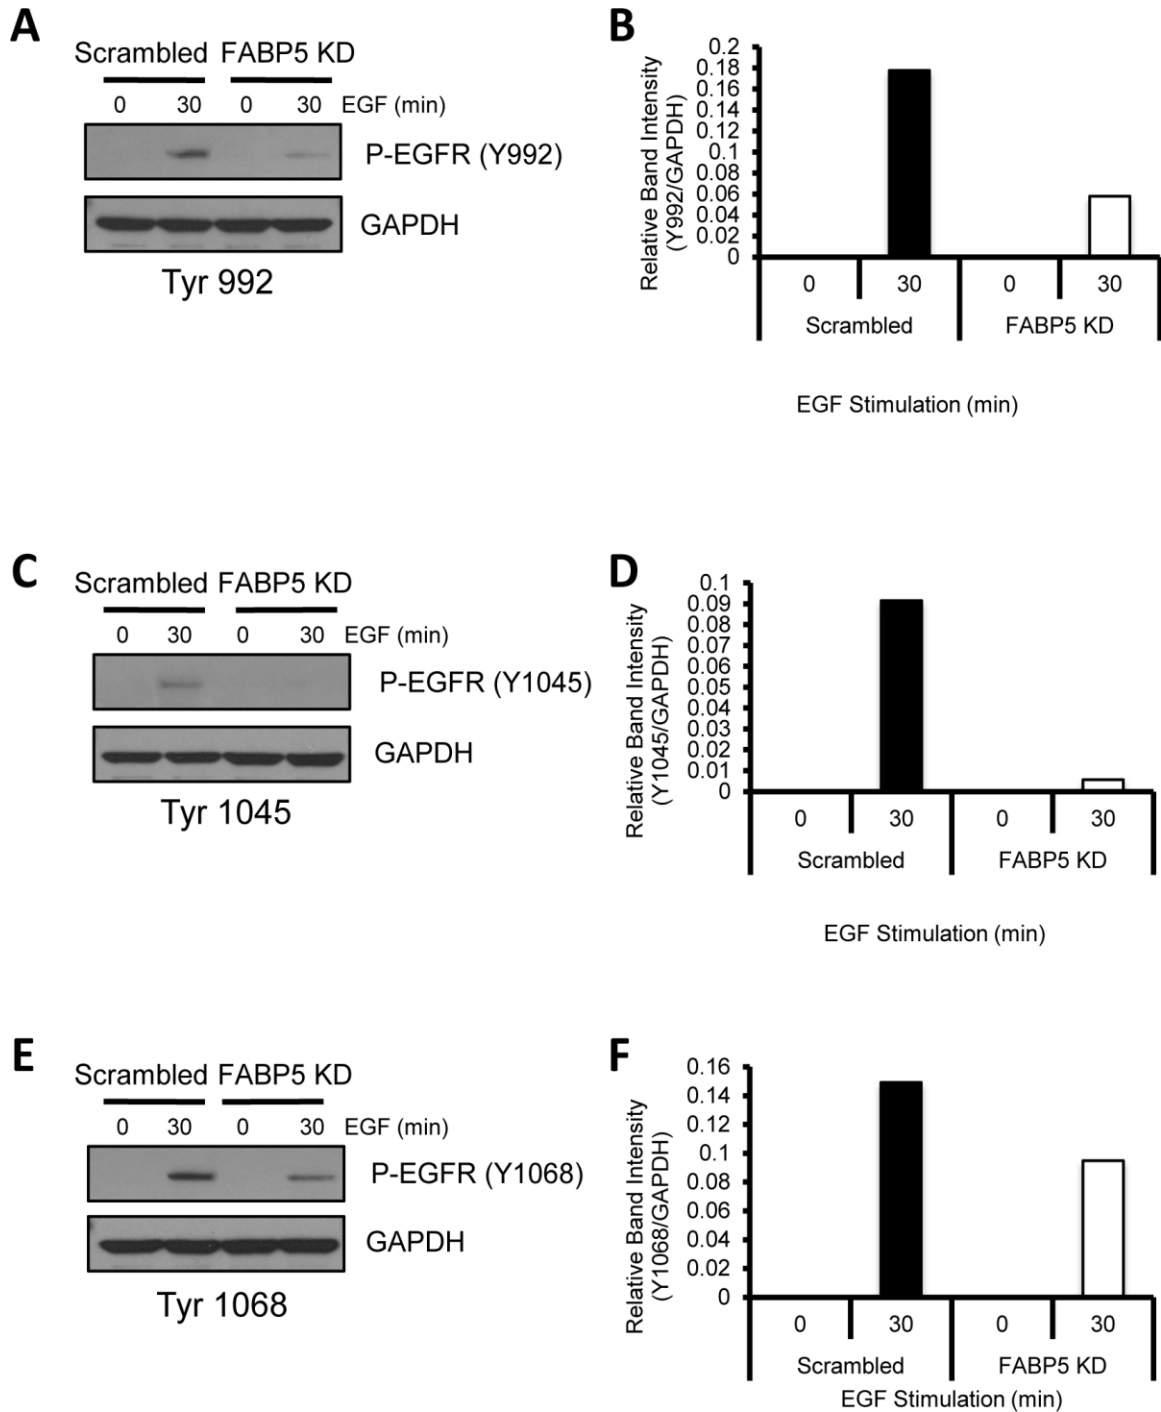

Supplemental Figure S2: Phosphorylation of EGFR decreased in FABP5 KD cells. Scrambled and FABP5 KD cells were serum starved overnight and stimulated with EGF (50 ng/mL) for indicated time points. Cell lysates were harvested and subjected to western blot analysis for (A&B) phospho-EGFR (Y992), (C&D) phospho-EGFR (Y1045), and (E&F) phospho-EGFR (Y1068) with GAPDH as a loading control. Quantification of relative phospho-EGFR expression in scrambled and FABP5 KD cells with varying timepoints of EGF treatments calculated with respect to GAPDH.
